# Supplementary material for: RIPK3 and Caspase-1/11 Are Necessary for Optimal Antigen-Specific CD8 T Cell Response Elicited by Genetically Modified Listeria monocytogenes
Source: PubMed Central journal article supplement (PMC7160319; doi:10.3389/fimmu.2020.00536), 2020-04-09
Supplement: Data_Sheet_1.pdf [file Data_Sheet_1.pdf]

## Supplementary Material

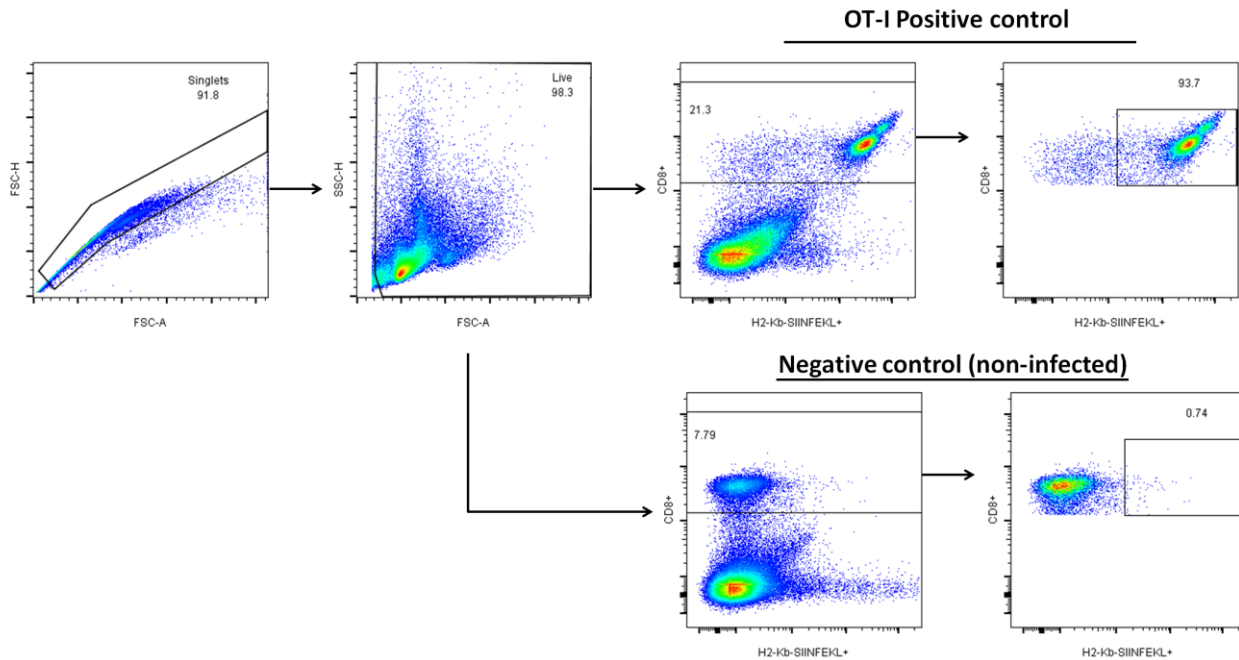

**Supplementary figure 1: Gate strategy to evaluate  $CD8^+ H2-K^b-SIINFEKL^+$  population.** FSC-A x FSC-H (Forward Scattered-Area x Forward Scattered-Height) to exclude doublets, then FSC-A x SSC-H (Forward Scattered-Area x Side Scattered-Height) to exclude debris and finally  $H2-K^b-SIINFEKL^+ \times CD8^+$  to separate  $CD8^+ H2-K^b-SIINFEKL^+$  population.

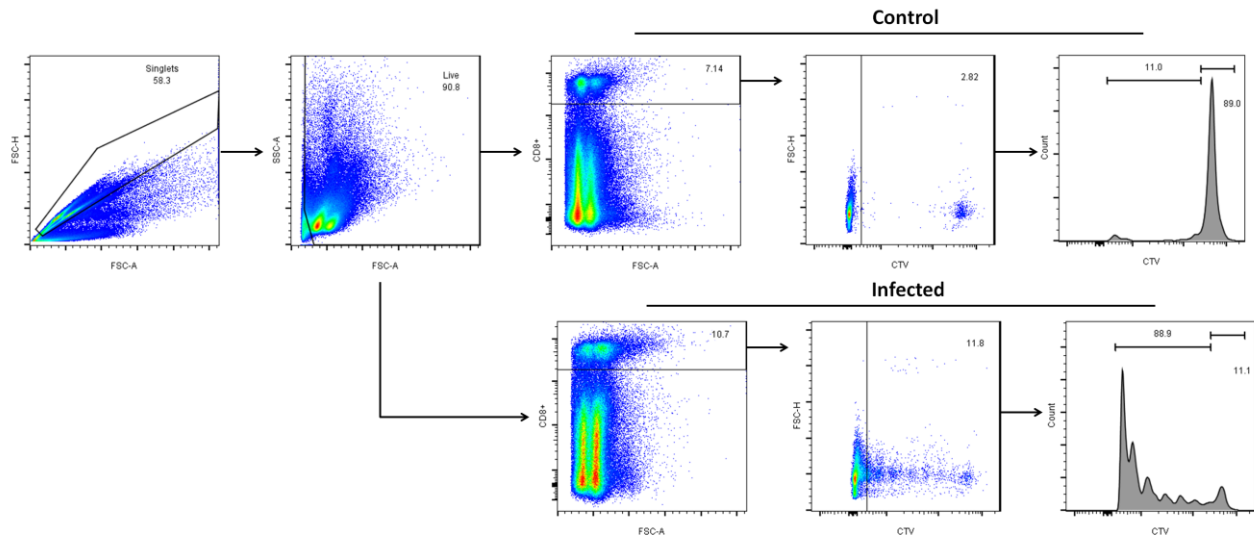

**Supplementary figure 2: Gate strategy to evaluate *in vivo* proliferation of OT-I cells.** FSC-A x FSC-H to exclude doublets, FSC-A x SSC-A (Forward Scattered-Area x Side Scattered-Area) to exclude debris, FSC-A x CD8<sup>+</sup> to separate CD8<sup>+</sup> T cell population, FSC-H x CTV to separate adoptively transferred OT-I CD8<sup>+</sup> cell population and finally CTV x Count to observe proliferation/division of OT-I CD8<sup>+</sup> T cell population.

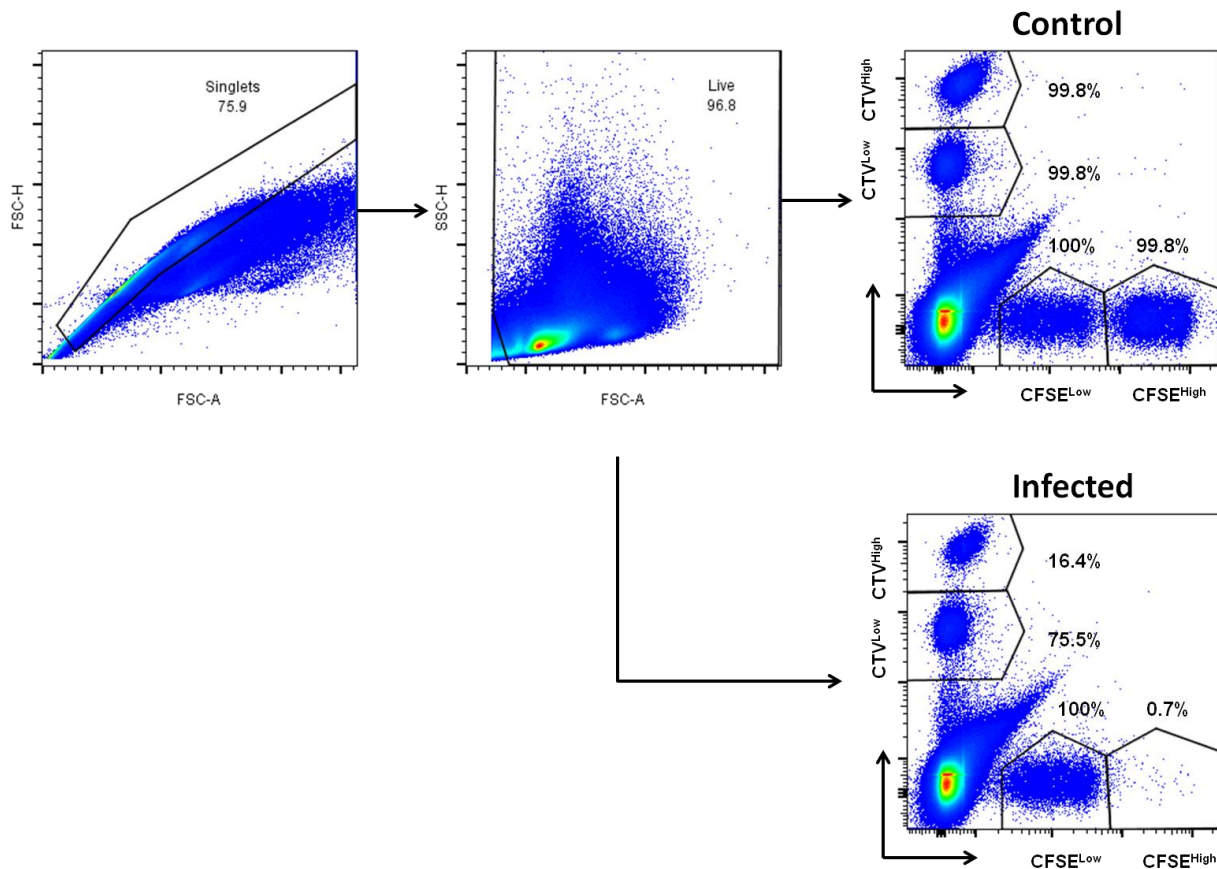

**Supplementary figure 3: Gate strategy to evaluate in vivo target cell killing by CTLs.** FSC-A x FSC-H to exclude doublets, FSC-A x SSC-H to exclude debris and finally CFSE<sup>High</sup>, CFSE<sup>Low</sup>, CTV<sup>High</sup> and CTV<sup>Low</sup> populations showing percentage of target cell killing by CTLs.

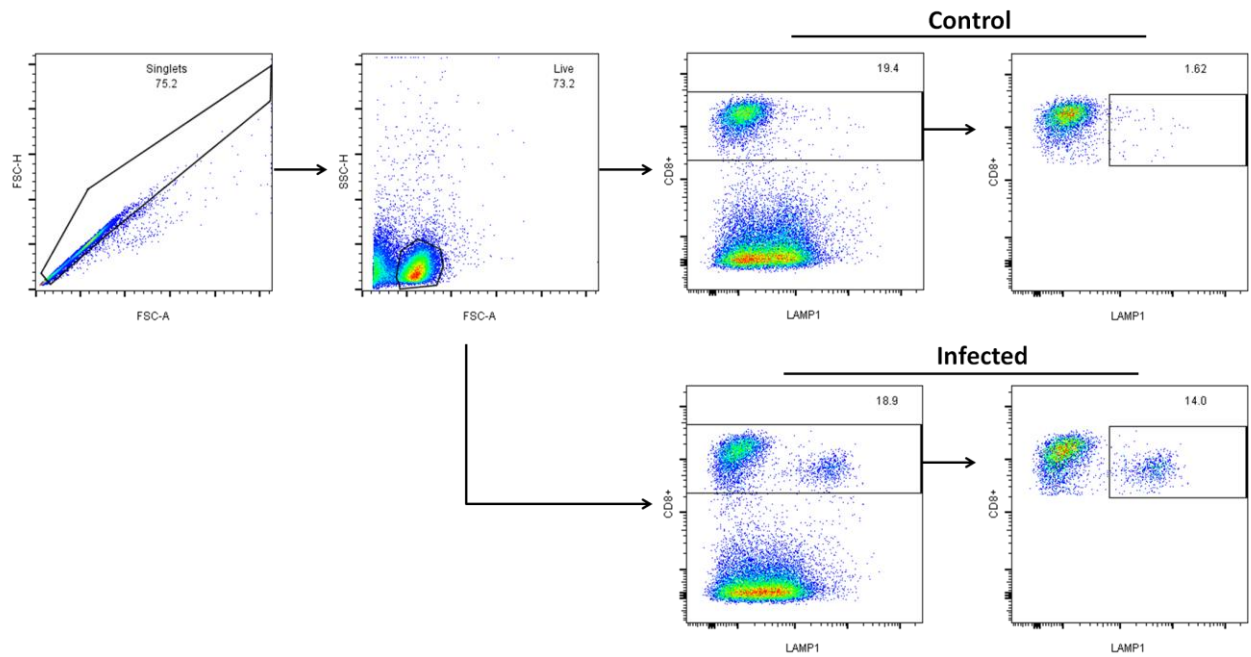

**Supplementary figure 4: Gate strategy for CD8<sup>+</sup> LAMP1<sup>+</sup> population.** FSC-A x FSC-H to exclude doublets, then FSC-A x SSC-H to exclude debris and finally LAMP1 x CD8<sup>+</sup> to separate CD8<sup>+</sup> LAMP1<sup>+</sup> population.

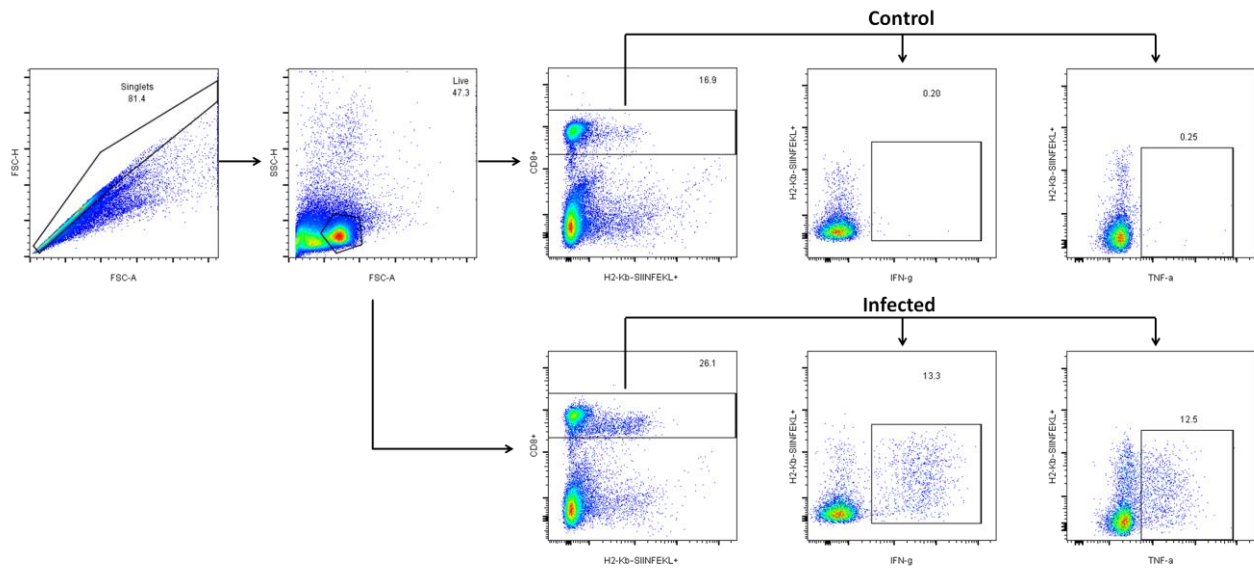

**Supplementary figure 5: Gate strategy for IFN- $\gamma$  and TNF- $\alpha$  expressing CD8<sup>+</sup> H2-K<sup>b</sup>-SIINFEKL<sup>+</sup> population.** FSC-A x FSC-H to exclude doublets, then FSC-A x SSC-H to exclude debris, H2-K<sup>b</sup>-SIINFEKL<sup>+</sup> x CD8<sup>+</sup> to separate H2-K<sup>b</sup>-SIINFEKL<sup>+</sup> x CD8<sup>+</sup> population, IFN- $\gamma$  x H2-K<sup>b</sup>-SIINFEKL<sup>+</sup> to separate IFN- $\gamma$ <sup>+</sup> population and TNF- $\alpha$  x H2-K<sup>b</sup>-SIINFEKL<sup>+</sup> to separate TNF- $\alpha$ <sup>+</sup> population.

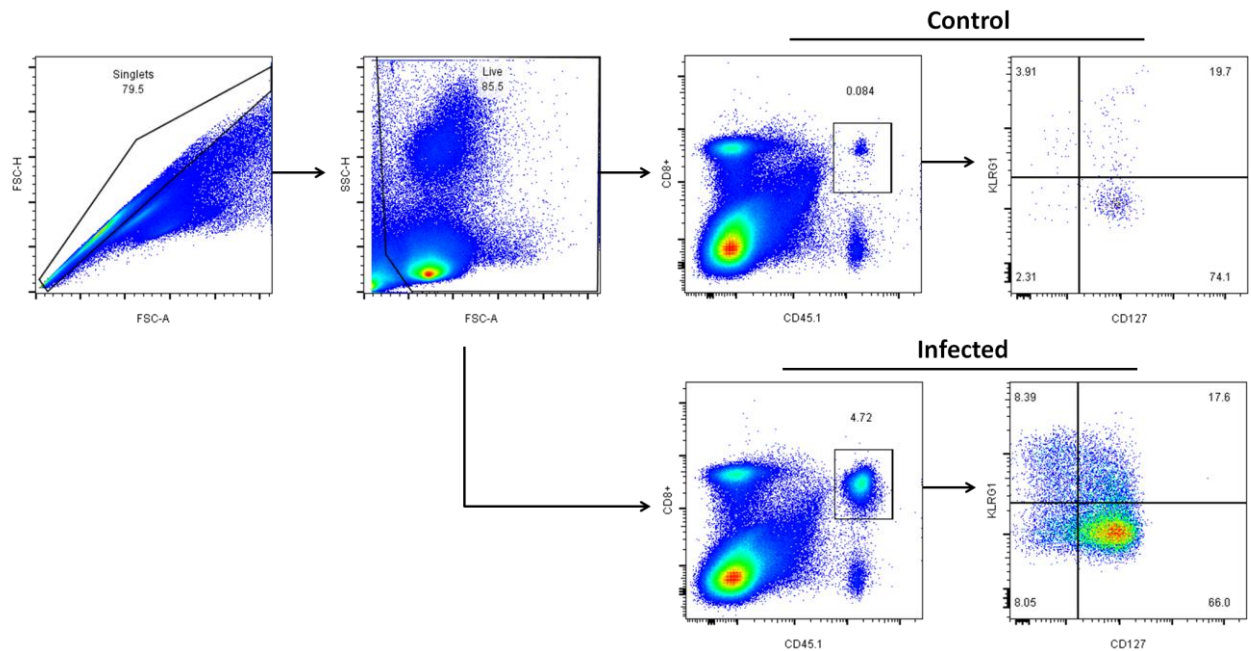

**Supplementary figure 6: Gate strategy to evaluate KLRG1<sup>+</sup> CD127<sup>+</sup> OT-I CD8<sup>+</sup> (CD45.1 CD45.2<sup>+</sup>) population.** FSC-A x FSC-H to exclude doublets, then FSC-A x SSC-H to exclude debris, CD45.1 x CD8<sup>+</sup> to separate CD45.1<sup>+</sup> CD45.2<sup>+</sup> adoptively transferred CD8<sup>+</sup> OT-1 cells and finally CD127 x KLRG1 to observe the frequency of KLRG1 and CD127<sup>+</sup> adoptively transferred CD8<sup>+</sup> OT-1 cells.



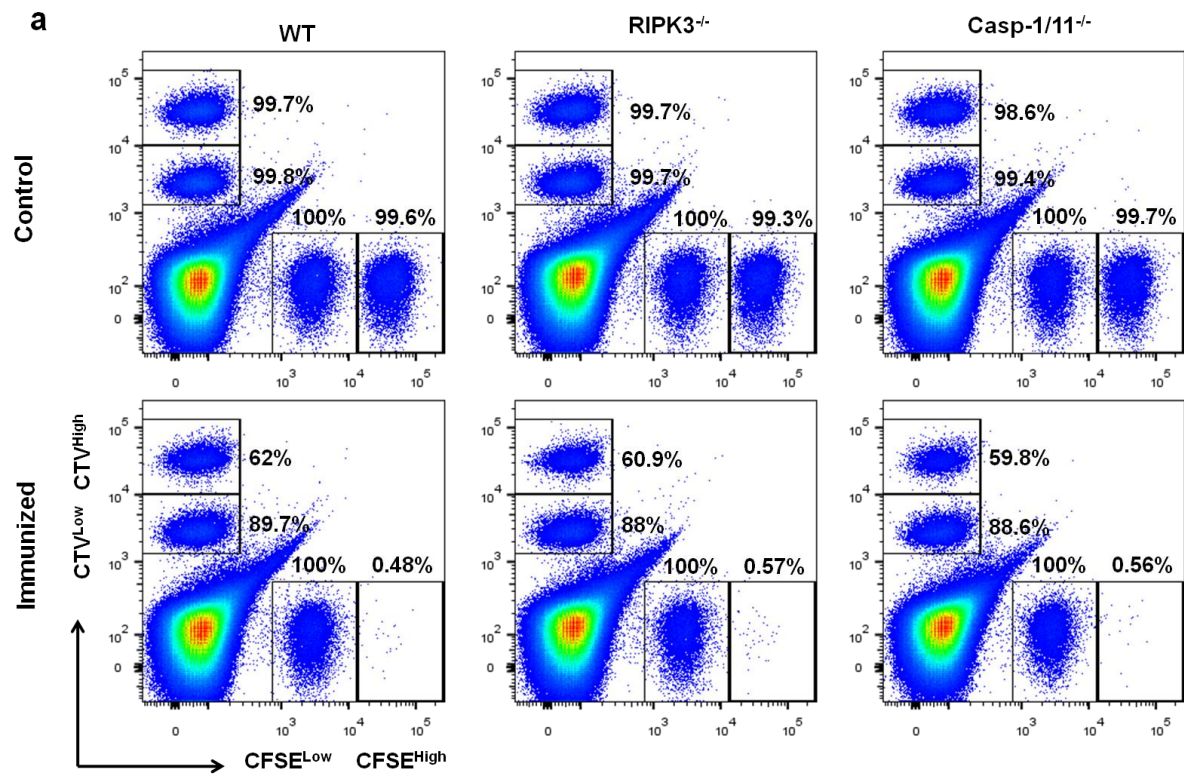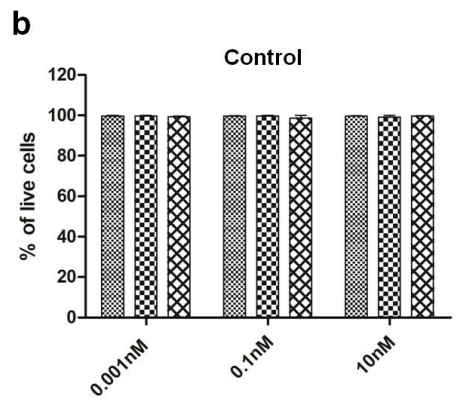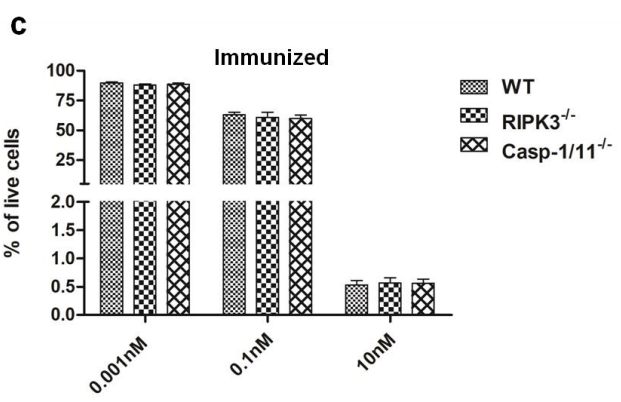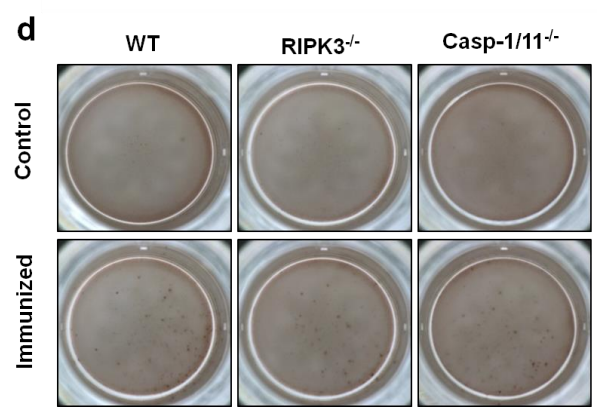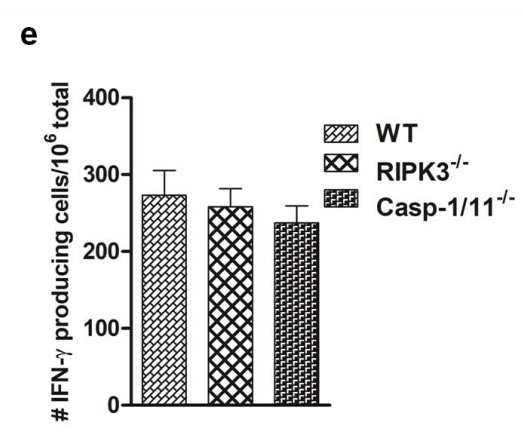

**Supplementary figure 7: Antigen-specific CD8<sup>+</sup> T cell response depends on antigen-delivery vector.** (a-c) *In vivo* elimination of target cells pulsed with high (10nM), intermediate (0.1nM) and low (0.001nM) concentration of OVA<sub>257-264</sub> peptide at day 7 post-immunization with rhAd5-OVA. (a) Percentage of CFSE<sup>High</sup>, CFSE<sup>Low</sup>, CTV<sup>High</sup> and CTV<sup>Low</sup> shows the frequency of remaining cells after CTL-mediated target cell elimination. Percentage of live target cells in (b) non-immunized and (c) immunized mice. (d, e) Frequency of IFN- $\gamma$  producing cells: Splenocytes from WT, RIPK3<sup>-/-</sup> and Casp-1/11<sup>-/-</sup> immunized or non-immunized mice pulsed with 10mM of OVA<sub>257-264</sub> peptide. Spots represent the frequency of OVA specific IFN- $\gamma$  producing CD8<sup>+</sup> T cells. The data is expressed as means of five individual mice per group and is representative of three independent experiments with similar results.
